# Supplementary material
Source: PubMed Central journal article supplement (PMC5824210)

## Supplementary Online Content

Shah MA, Bang Y-J, Lordick F, et al. Fluorouracil, leucovorin, and oxaliplatin with or without onartuzumab in HER2-negative, MET-positive gastroesophageal adenocarcinoma: the METGastric randomized clinical trial. *JAMA Oncol*. Published online October 5, 2016. doi:10.1001/jamaoncol.2016.5580

**eTable 1.** Baseline Characteristics of the Intent-to-Treat Population

**eTable 2.** MET IHC Scoring Qualification of Central Laboratory Pathologists

**eTable 3.** All Grade and Grade  $\geq 3$  AEs

**eFigure 1.** Study design

**eFigure 2.** Met IHC scoring criteria and representative staining

**eFigure 3.** OS (A) and PFS (B) in the MET 2+/3+ subpopulation

**eFigure 4.** Overall Survival by MET status, region, and prior gastrectomy

This supplementary material has been provided by the authors to give readers additional information about their work.

**eTable 1. Baseline Characteristics of the Intent-to-Treat Population**

| Characteristics                            | Placebo +<br>mFOLFOX6<br>(n = 283) | Onartuzumab +<br>mFOLFOX6<br>(n = 279) |
|--------------------------------------------|------------------------------------|----------------------------------------|
| Age, median (range), y                     | 58.0 (23-84)                       | 60.0 (24-82)                           |
| Sex, No. (%)                               |                                    |                                        |
| Male                                       | 183 (64.7)                         | 188 (67.4)                             |
| Female                                     | 100 (35.3)                         | 91 (32.6)                              |
| Race, No. (%)                              |                                    |                                        |
| White                                      | 180 (63.6)                         | 172 (61.6)                             |
| Black or African American                  | 2 (0.7)                            | 3 (1.1)                                |
| Asian                                      | 89 (31.4)                          | 94 (33.7)                              |
| Other                                      | 12 (4.3)                           | 10 (3.7)                               |
| ECOG PS, No. (%)                           |                                    |                                        |
| 0                                          | 118 (41.7)                         | 112 (40.1)                             |
| 1 <sup>a</sup>                             | 158 (55.8)                         | 162 (58.1)                             |
| Primary tumor site, No. (%)                |                                    |                                        |
| Stomach                                    | 218 (77.0)                         | 214 (76.7)                             |
| Gastroesophageal junction                  | 65 (23.0)                          | 65 (23.3)                              |
| Gastric cancer histologic subtype, No. (%) | (n = 283)                          | (n = 277)                              |
| Intestinal                                 | 133 (47.0)                         | 136 (49.1)                             |
| Diffuse                                    | 98 (34.6)                          | 83 (30.0)                              |
| Mixed                                      | 42 (14.8)                          | 39 (14.1)                              |
| Not evaluable                              | 10 (3.5)                           | 19 (6.9)                               |
| Prior gastrectomy                          |                                    |                                        |
| Yes                                        | 101 (35.7)                         | 98 (35.1)                              |
| No                                         | 182 (64.3)                         | 181 (64.9)                             |
| MET score, No. (%)                         |                                    |                                        |
| 1+                                         | 173 (61.1)                         | 171 (61.3)                             |
| 2+                                         | 94 (33.2)                          | 85 (30.5)                              |
| 3+                                         | 15 (5.3)                           | 20 (7.2)                               |
| Not done                                   | 1 (0.4)                            | 3 (1.1)                                |
| Region, No. (%)                            |                                    |                                        |
| Asia-Pacific                               | 88 (31.1)                          | 88 (31.5)                              |
| Other                                      | 195 (68.9)                         | 191 (68.5)                             |

Abbreviations: ECOG PS, Eastern Cooperative Oncology Group performance status; MET, mesenchymal-epithelial transition; mFOLFOX6, fluorouracil, leucovorin, and oxaliplatin.

<sup>a</sup>Includes patients who were considered ECOG PS 2 after enrollment.

**eTable 2. MET IHC Scoring Qualification of Central Laboratory Pathologists**

| <b>Agreement Rate</b>      | <b>n (%)</b>   |
|----------------------------|----------------|
| Overall percent agreement  | 247/250 (98.8) |
| Average positive agreement | 210/210 (100)  |
| Average negative agreement | 37/40 (92.5)   |

**eTable 3. All Grade<sup>a</sup> and Grade ≥3 AEs**

| AE, n (%)                     | Placebo + mFOLFOX6<br>(n = 280) |           | Onartuzumab + mFOLFOX6<br>(n = 279) |           |
|-------------------------------|---------------------------------|-----------|-------------------------------------|-----------|
|                               | All Grades                      | Grade ≥3  | All Grades                          | Grade ≥3  |
| Nausea                        | 141 (50.4)                      | 13 (4.6)  | 133 (47.7)                          | 7 (2.5)   |
| Neutropenia                   | 112 (40.0)                      | 82 (29.3) | 126 (45.2)                          | 98 (35.1) |
| Fatigue                       | 87 (31.1)                       | 11 (3.9)  | 77 (27.6)                           | 13 (4.7)  |
| Diarrhea                      | 78 (27.9)                       | 5 (1.8)   | 85 (30.5)                           | 8 (2.9)   |
| Vomiting                      | 79 (28.2)                       | 12 (4.3)  | 72 (25.8)                           | 8 (2.9)   |
| Decreased appetite            | 78 (27.9)                       | 8 (2.9)   | 75 (26.9)                           | 6 (2.2)   |
| Peripheral edema              | 22 (7.9)                        | 1 (0.4)   | 110 (39.4)                          | 13 (4.7)  |
| Constipation                  | 62 (22.1)                       | 1 (0.4)   | 46 (16.5)                           | 1 (0.4)   |
| Asthenia                      | 54 (19.3)                       | 10 (3.6)  | 55 (19.7)                           | 13 (4.7)  |
| Peripheral neuropathy         | 51 (18.2)                       | 5 (1.8)   | 52 (18.6)                           | 7 (2.5)   |
| Anemia                        | 48 (17.1)                       | 15 (5.4)  | 48 (17.2)                           | 14 (5.0)  |
| Paresthesia                   | 50 (17.9)                       | 1 (0.4)   | 40 (14.3)                           | 6 (2.2)   |
| Abdominal pain                | 40 (14.3)                       | 7 (2.5)   | 38 (13.6)                           | 3 (1.1)   |
| Thrombocytopenia              | 29 (10.4)                       | 3 (1.1)   | 47 (16.8)                           | 12 (4.3)  |
| Alopecia                      | 40 (14.3)                       | -         | 33 (11.8)                           | -         |
| Stomatitis                    | 37 (13.2)                       | 0 (0.0)   | 35 (12.5)                           | 2 (0.7)   |
| Dysgeusia                     | 34 (12.1)                       | -         | 34 (12.2)                           | -         |
| Hypoalbuminemia               | 10 (3.6)                        | 1 (0.4)   | 56 (20.1)                           | 16 (5.7)  |
| Pyrexia                       | 35 (12.5)                       | 1 (0.4)   | 29 (10.4)                           | 0 (0.0)   |
| Peripheral sensory neuropathy | 29 (10.4)                       | 4 (1.4)   | 18 (6.5)                            | 1 (0.4)   |
| Insomnia                      | 29 (10.4)                       | -         | 13 (4.7)                            | -         |

<sup>a</sup>Includes all grade AEs occurring at an incidence of >10% in either treatment arm. Multiple occurrences of the same AE in one individual are counted only once. Note, one patient randomized to the placebo arm received onartuzumab during the first treatment cycle; data for this patient were included in the onartuzumab arm for analysis of safety.

Abbreviations: AE, adverse event; mFOLFOX6, 5-fluorouracil, leucovorin, and oxaliplatin.

**eFigure 1. Study design**

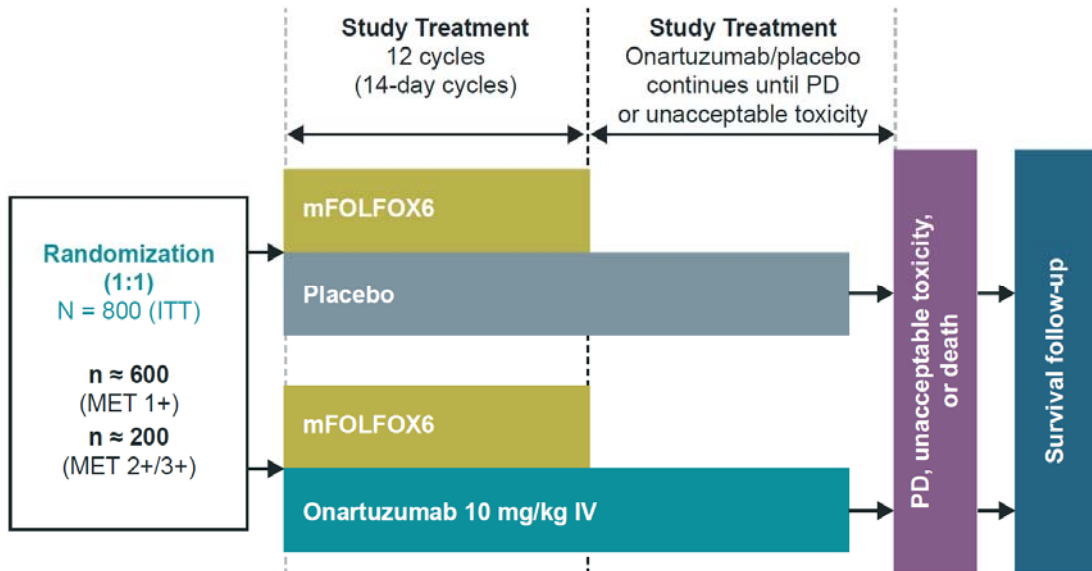

Abbreviations: HER2, human epidermal growth factor receptor 2; IHC, immunohistochemistry; ITT, intent-to-treat; MET, mesenchymal-epithelial transition; mFOLFOX6, 5-fluorouracil, leucovorin, and oxaliplatin; PD, disease progression.

**eFigure 2. Met IHC scoring criteria and representative staining**

| Clinical Diagnosis | Clinical Score | Staining Criteria                                                                                                                         |
|--------------------|----------------|-------------------------------------------------------------------------------------------------------------------------------------------|
| Negative           | 0              | No or equivocal staining in tumor cells or <50% tumor cells with membrane and/or cytoplasmic staining                                     |
| Negative           | 1+             | ≥50% tumor cells with WEAK or higher membrane and/or cytoplasmic staining but <50% tumor cells with moderate or higher staining intensity |
| Positive           | 2+             | ≥50% tumor cells with MODERATE or higher membrane and/or cytoplasmic staining but <50% tumor cells with strong staining intensity         |
| Positive           | 3+             | ≥50% tumor cells with STRONG or higher membrane and/or cytoplasmic staining intensity                                                     |

**Clinical Score = 0**

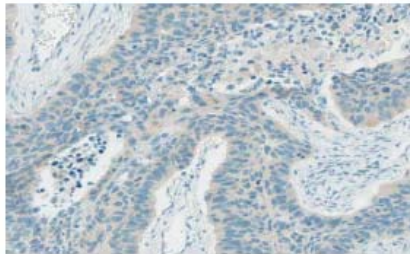

**Clinical Score = 1**

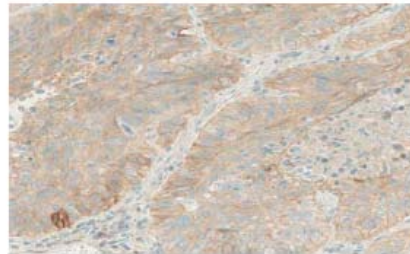

**Clinical Score = 2**

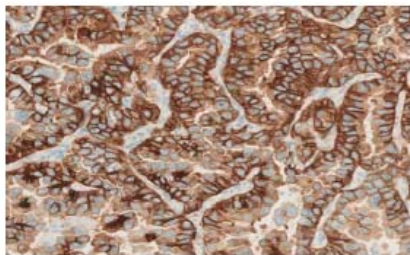

**Clinical Score = 3**

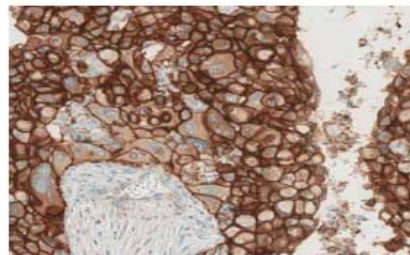

**eFigure 3. OS (A) and PFS (B) in the MET 2+/3+ subpopulation**

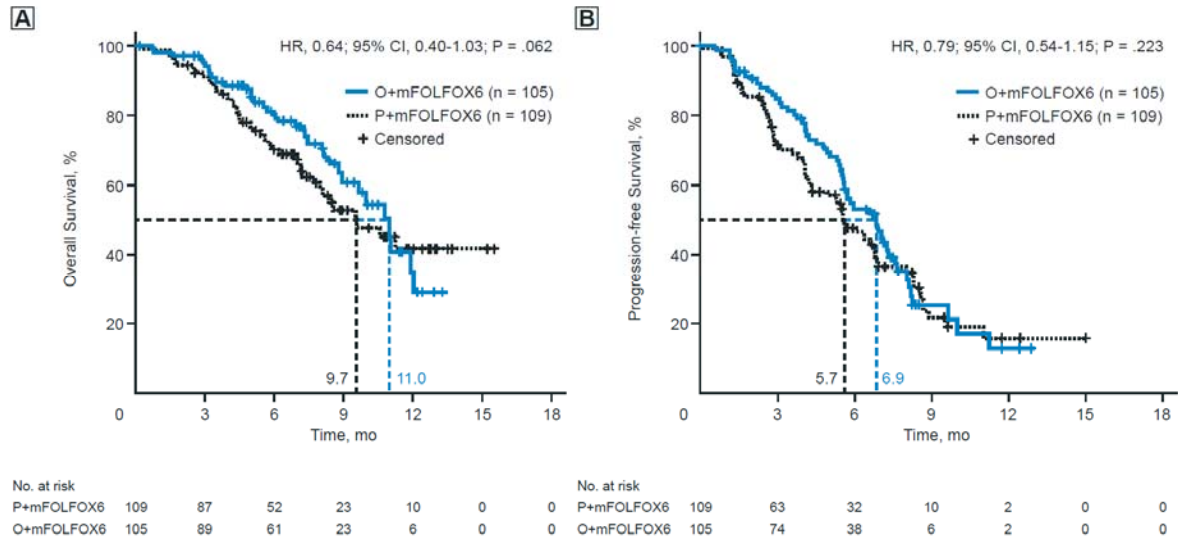

**eFigure 4. Overall Survival by MET status, region, and prior gastrectomy**

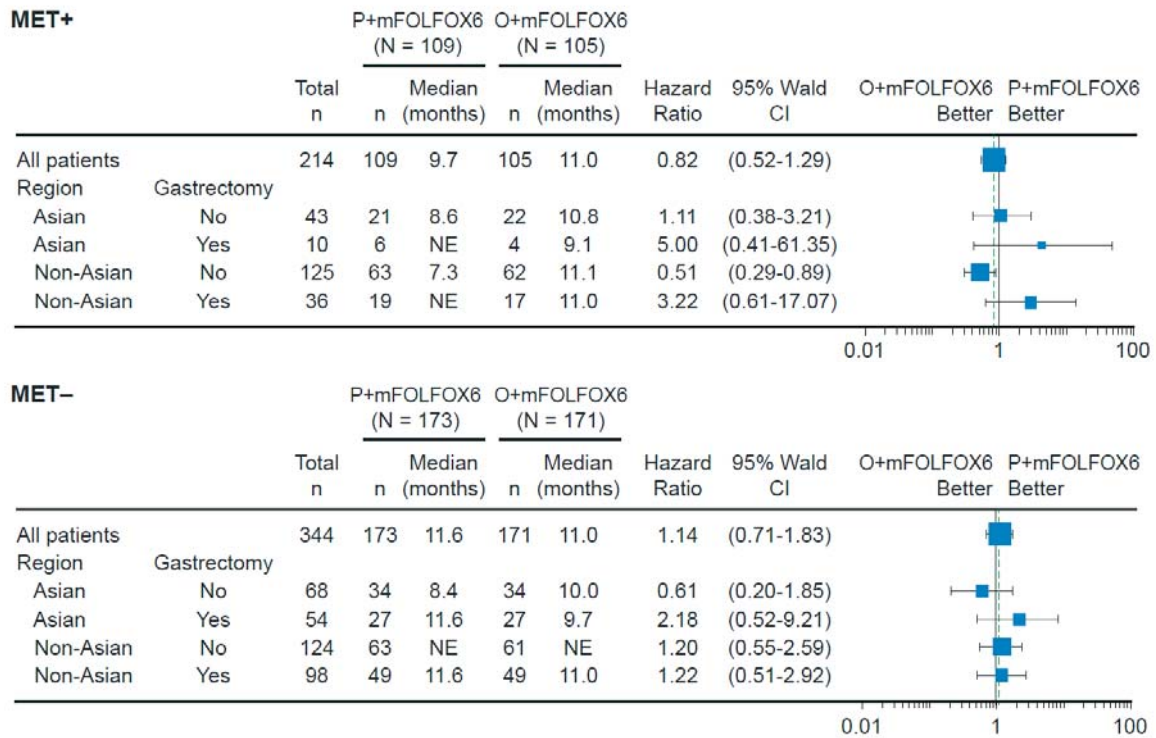

Supplement: jamaoncol-3-620-s002.pdf [file jamaoncol-3-620-s002.pdf]
